# Supplementary material for: Secondary Metabolites from the Soft Coral Sinularia arborea
Source: Mar Drugs. 2013 Sep 3;11(9):3372–80. doi: 10.3390/md11093372 (PMC3801123; doi:10.3390/md11093372)

## Supplementary Materials

|                                                                                                     |    |
|-----------------------------------------------------------------------------------------------------|----|
| <b>Figure S1.</b> $^1\text{H}$ NMR spectrum (400 MHz) of compound <b>1</b> in $\text{CDCl}_3$ .     | 2  |
| <b>Figure S2.</b> $^{13}\text{C}$ NMR spectrum (100 MHz) of compound <b>1</b> in $\text{CDCl}_3$ .  | 2  |
| <b>Figure S3.</b> HSQC spectrum (400 MHz) of compound <b>1</b> in $\text{CDCl}_3$ .                 | 3  |
| <b>Figure S4.</b> HMBC spectrum (400 MHz) of compound <b>1</b> in $\text{CDCl}_3$ .                 | 3  |
| <b>Figure S5.</b> COSY spectrum (400 MHz) of compound <b>1</b> in $\text{CDCl}_3$ .                 | 4  |
| <b>Figure S6.</b> NOESY spectrum (400 MHz) of compound <b>1</b> in $\text{CDCl}_3$ .                | 4  |
| <b>Figure S7.</b> $^1\text{H}$ NMR spectrum (400 MHz) of compound <b>2</b> in $\text{CDCl}_3$ .     | 5  |
| <b>Figure S8.</b> $^{13}\text{C}$ NMR spectrum (100 MHz) of compound <b>2</b> in $\text{CDCl}_3$ .  | 5  |
| <b>Figure S9.</b> HSQC spectrum (400 MHz) of compound <b>2</b> in $\text{CDCl}_3$ .                 | 6  |
| <b>Figure S10.</b> HMBC spectrum (400 MHz) of compound <b>2</b> in $\text{CDCl}_3$ .                | 6  |
| <b>Figure S11.</b> COSY spectrum (400 MHz) of compound <b>2</b> in $\text{CDCl}_3$ .                | 7  |
| <b>Figure S12.</b> NOESY spectrum (400 MHz) of compound <b>2</b> in $\text{CDCl}_3$ .               | 7  |
| <b>Figure S13.</b> $^1\text{H}$ NMR spectrum (400 MHz) of compound <b>3</b> in $\text{CDCl}_3$ .    | 8  |
| <b>Figure S14.</b> $^{13}\text{C}$ NMR spectrum (100 MHz) of compound <b>3</b> in $\text{CDCl}_3$ . | 8  |
| <b>Figure S15.</b> HSQC spectrum (400 MHz) of compound <b>3</b> in $\text{CDCl}_3$ .                | 9  |
| <b>Figure S16.</b> HMBC spectrum (400 MHz) of compound <b>3</b> in $\text{CDCl}_3$ .                | 9  |
| <b>Figure S17.</b> COSY spectrum (400 MHz) of compound <b>3</b> in $\text{CDCl}_3$ .                | 10 |
| <b>Figure S18.</b> NOESY spectrum (400 MHz) of compound <b>3</b> in $\text{CDCl}_3$ .               | 10 |

**Figure S1.**  $^1\text{H}$  NMR spectrum (400 MHz) of compound **1** in  $\text{CDCl}_3$ .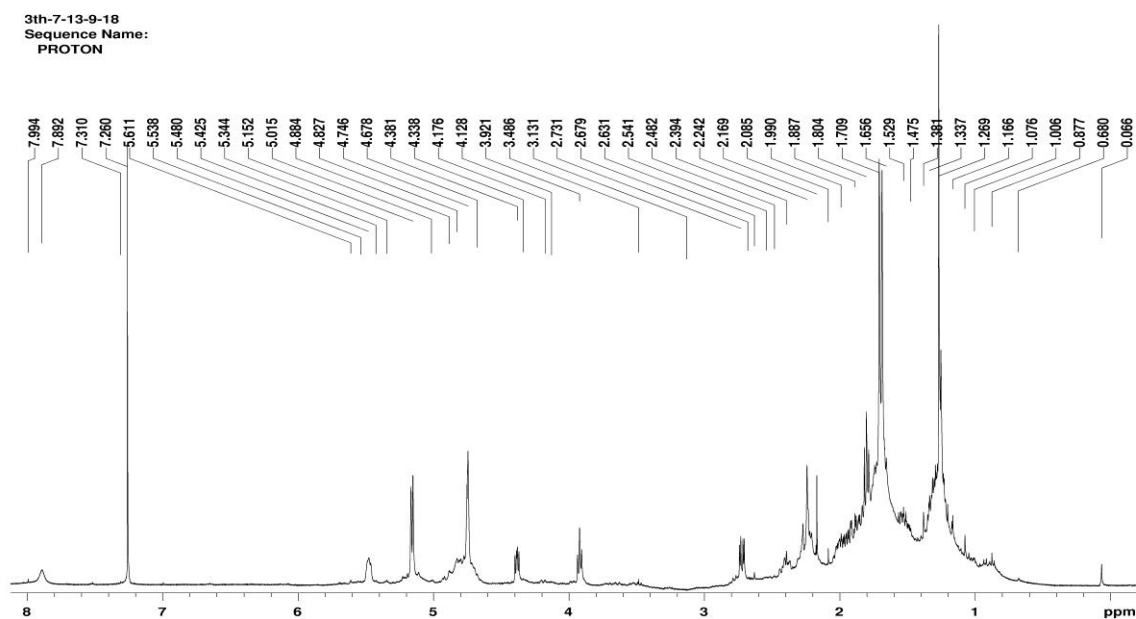**Figure S2.**  $^{13}\text{C}$  NMR spectrum (100 MHz) of compound **1** in  $\text{CDCl}_3$ .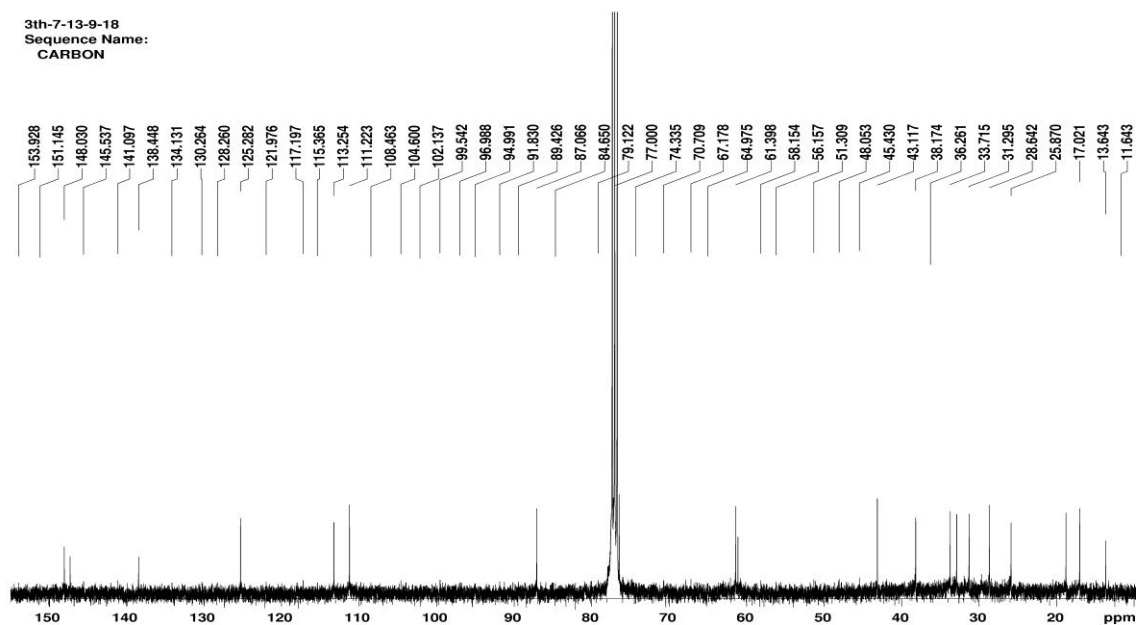

**Figure S3.** HSQC spectrum (400 MHz) of compound **1** in CDCl<sub>3</sub>.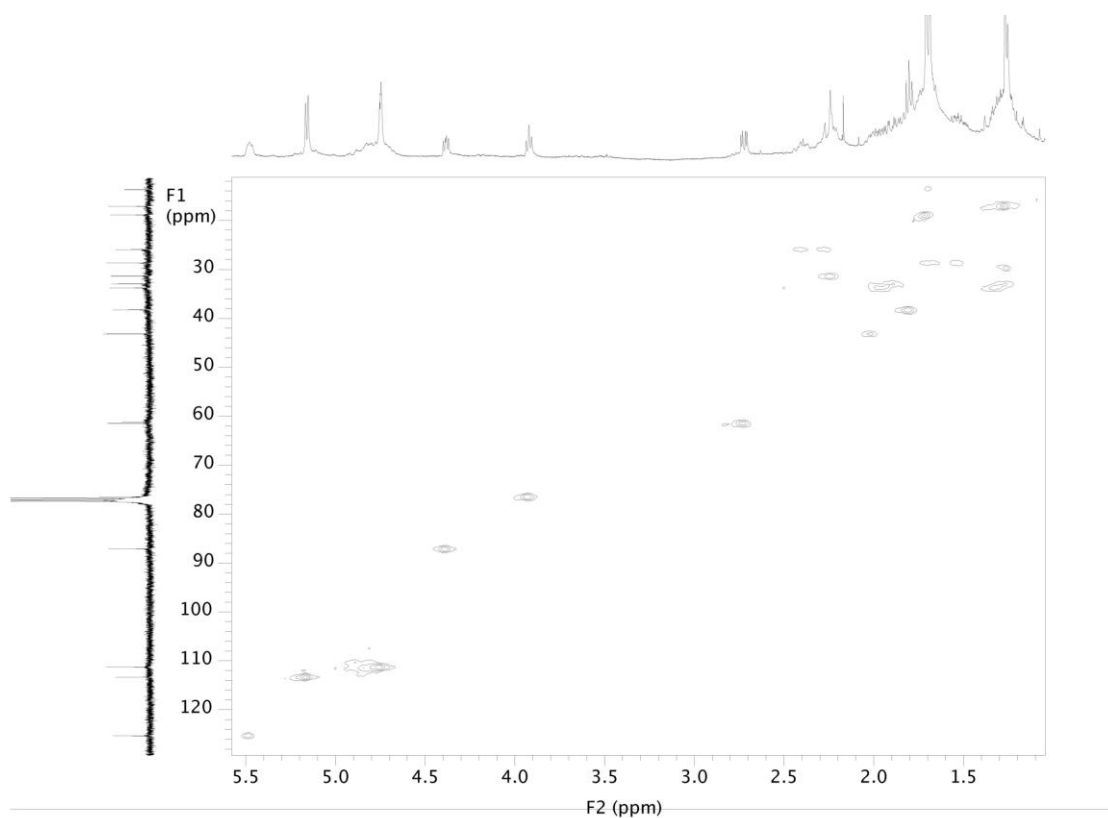**Figure S4.** HMBC spectrum (400 MHz) of compound **1** in CDCl<sub>3</sub>.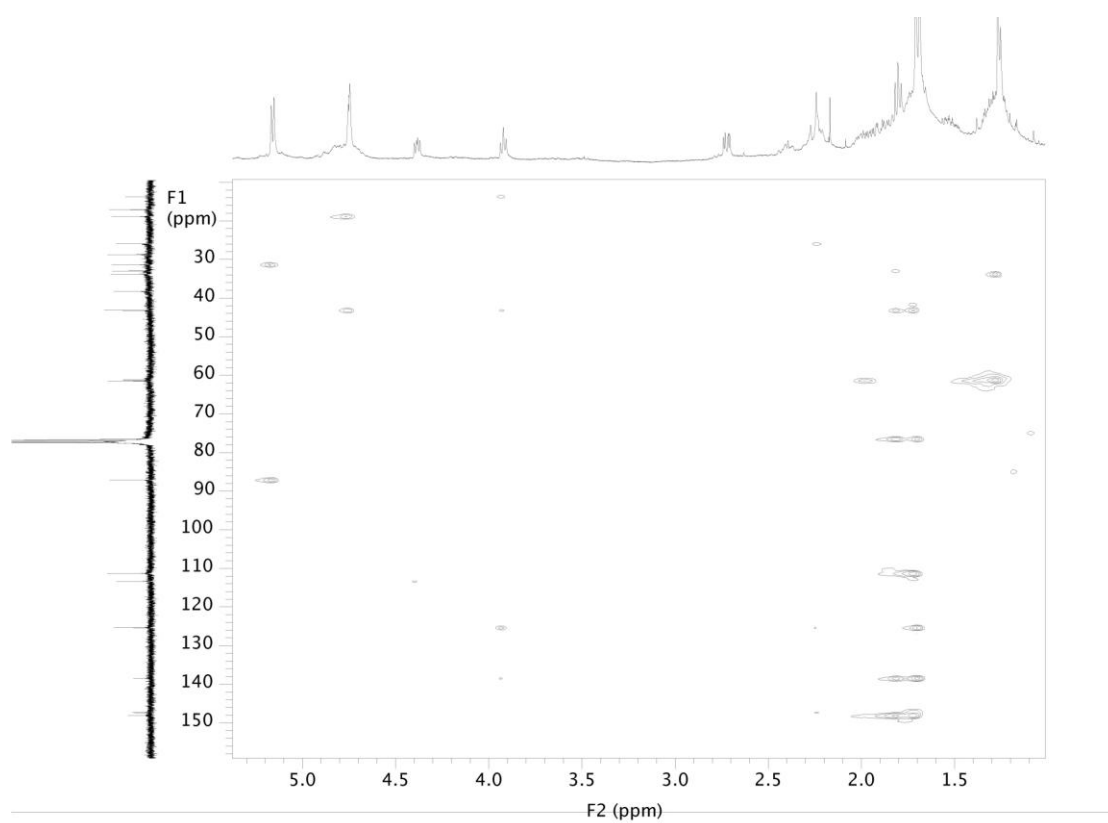

**Figure S5.** COSY spectrum (400 MHz) of compound **1** in CDCl<sub>3</sub>.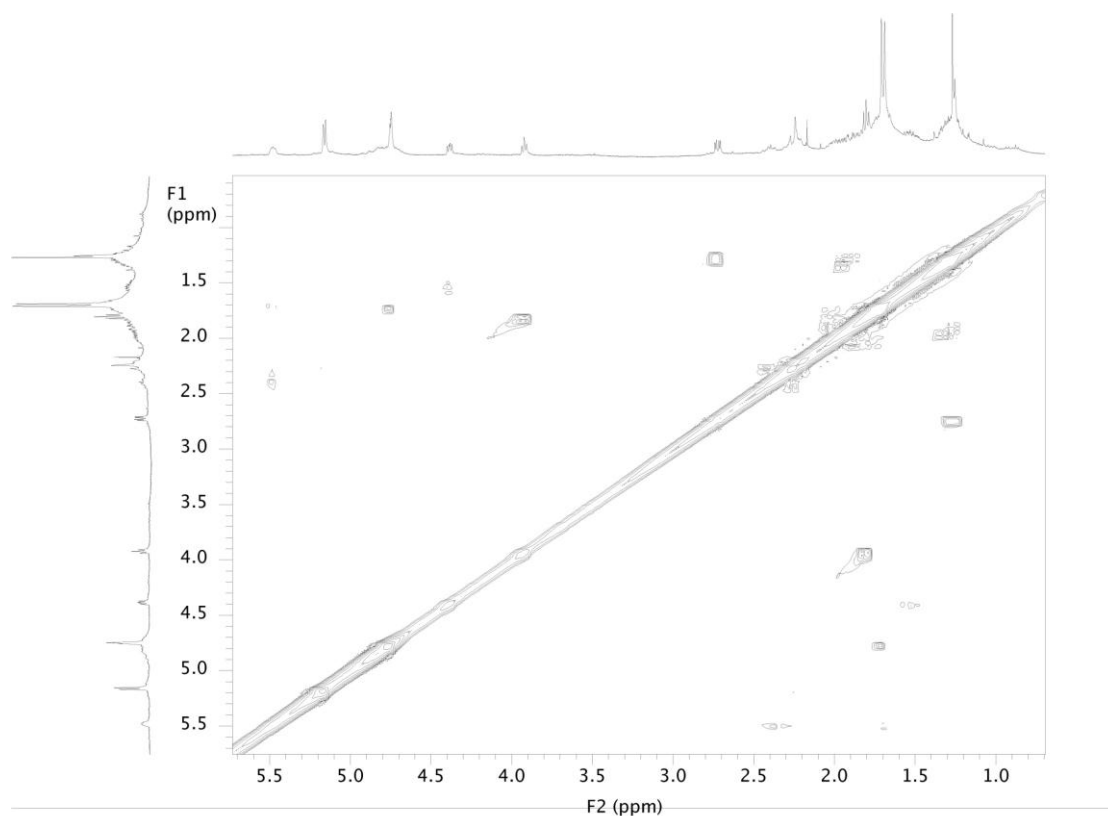**Figure S6.** NOESY spectrum (400 MHz) of compound **1** in CDCl<sub>3</sub>.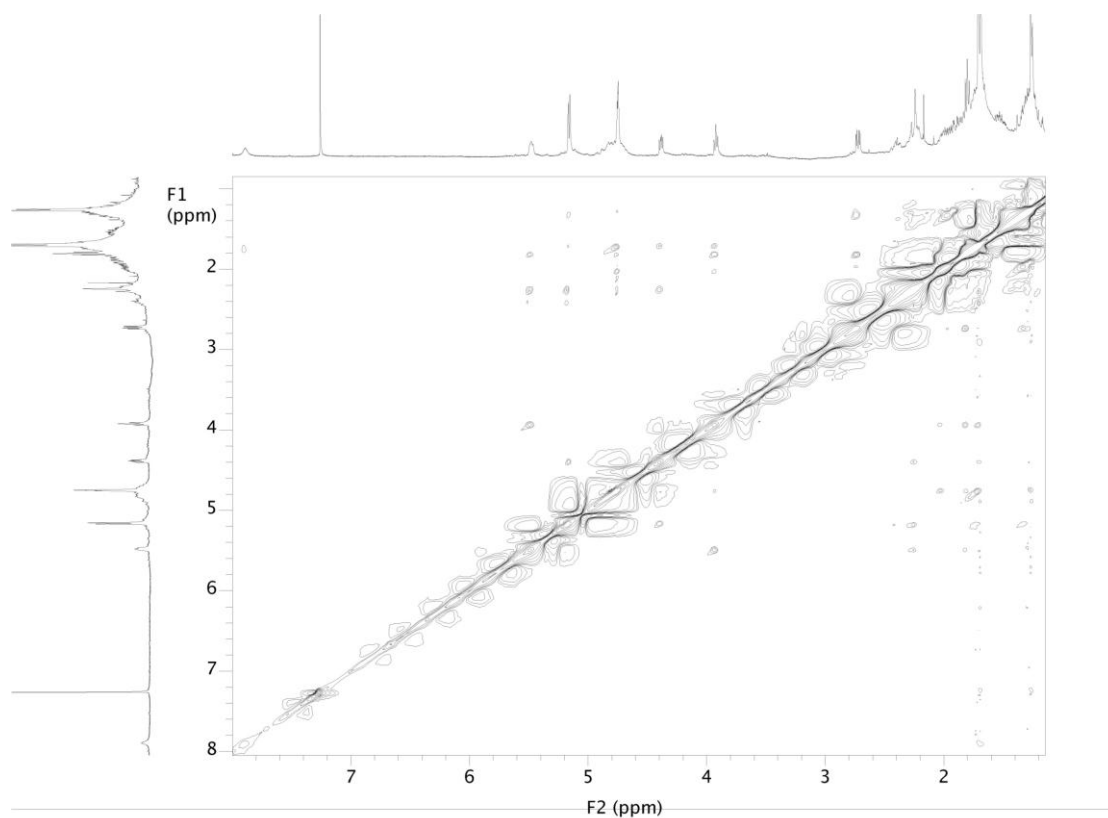

**Figure S7.**  $^1\text{H}$  NMR spectrum (400 MHz) of compound **2** in  $\text{CDCl}_3$ .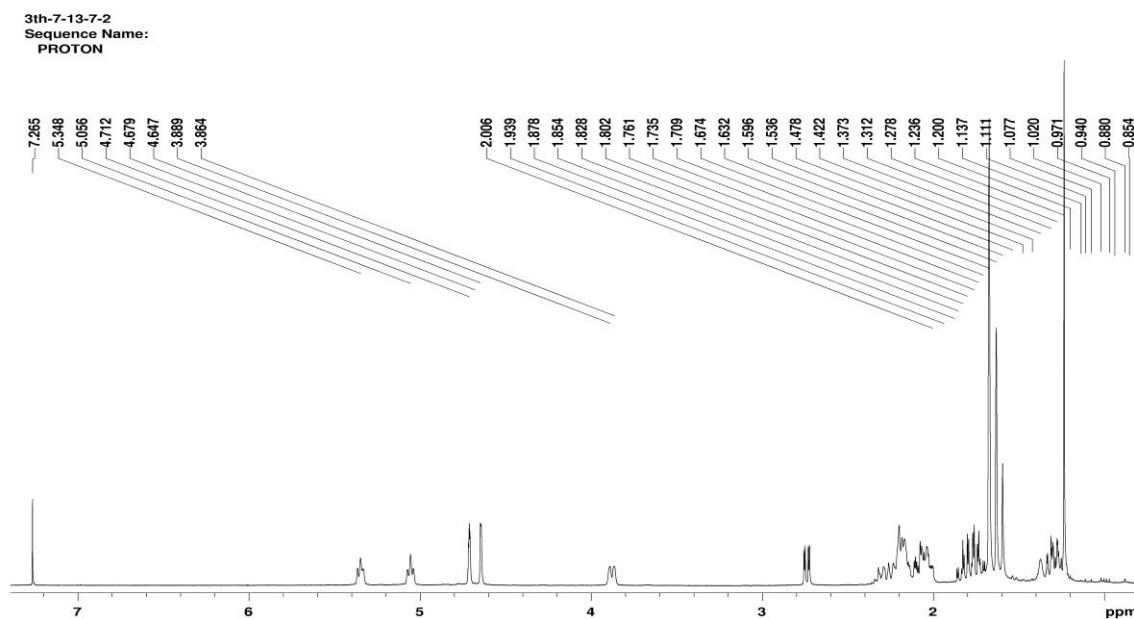**Figure S8.**  $^{13}\text{C}$  NMR spectrum (100 MHz) of compound **2** in  $\text{CDCl}_3$ .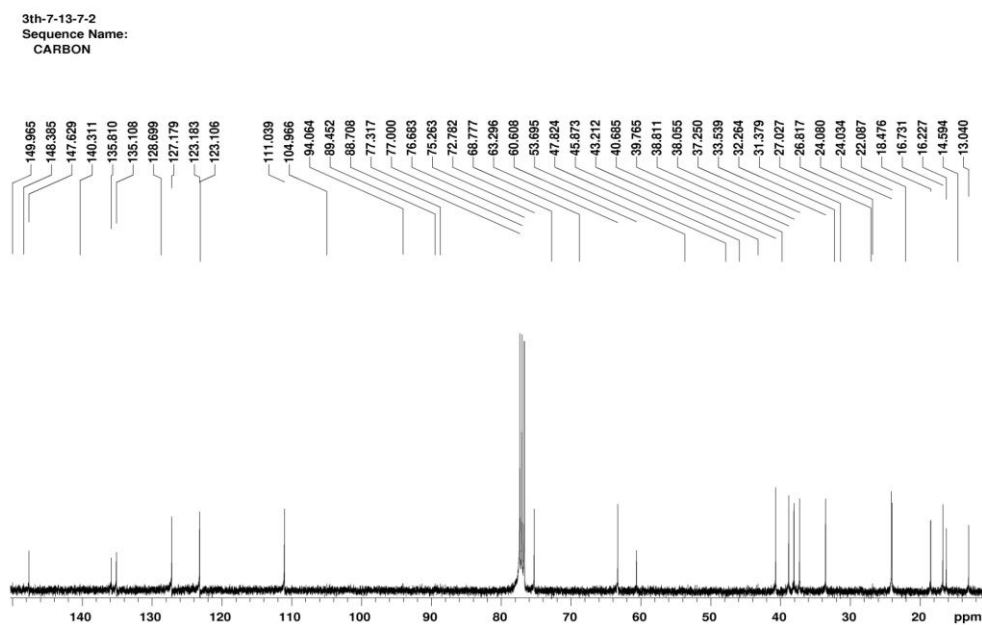

**Figure S9.** HSQC spectrum (400 MHz) of compound **2** in CDCl<sub>3</sub>.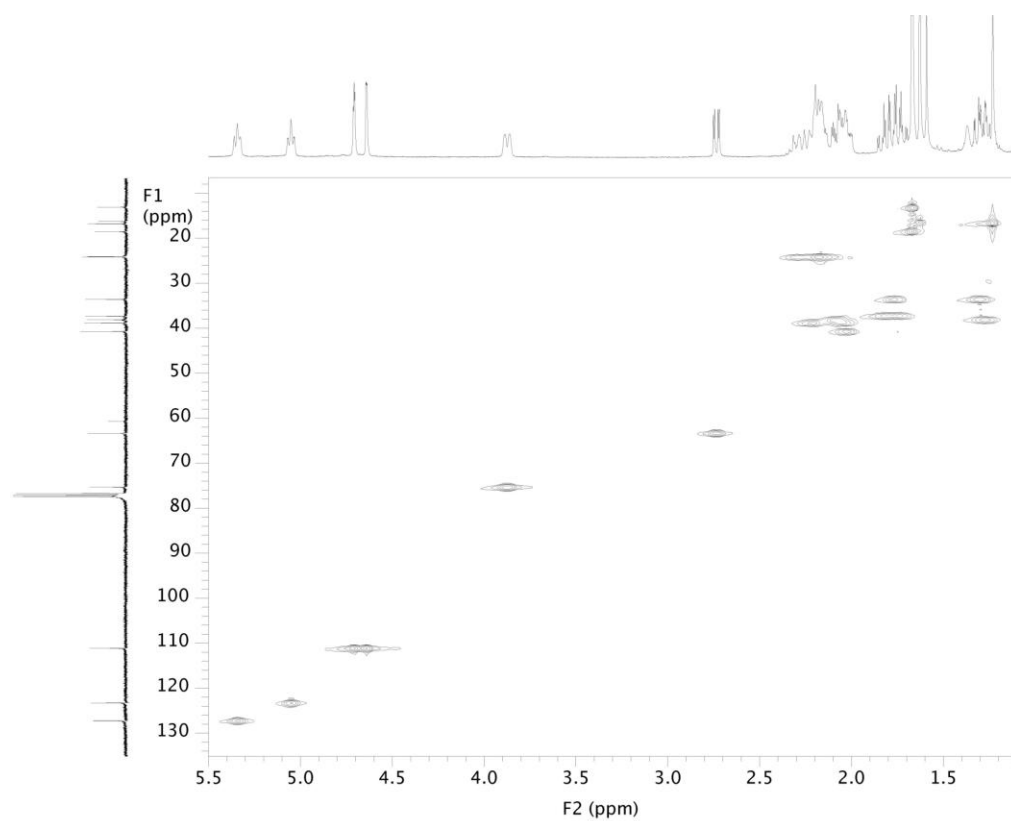**Figure S10.** HMBC spectrum (400 MHz) of compound **2** in CDCl<sub>3</sub>.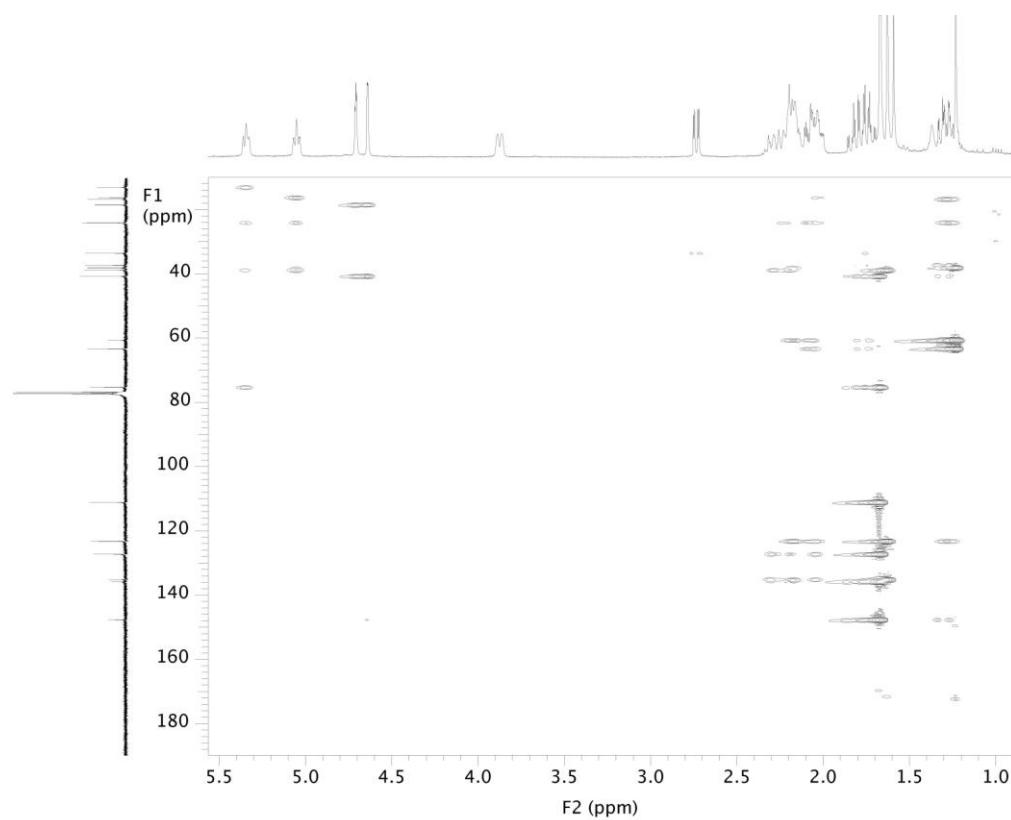

**Figure S11.** COSY spectrum (400 MHz) of compound **2** in CDCl<sub>3</sub>.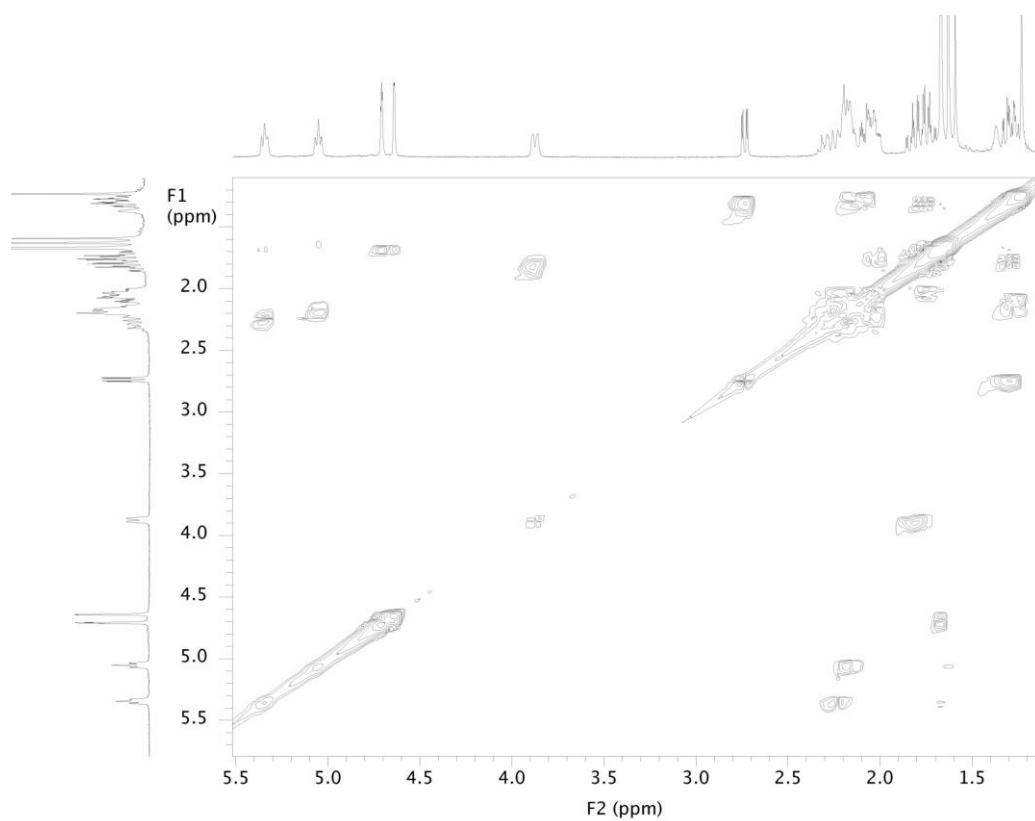**Figure S12.** NOESY spectrum (400 MHz) of compound **2** in CDCl<sub>3</sub>.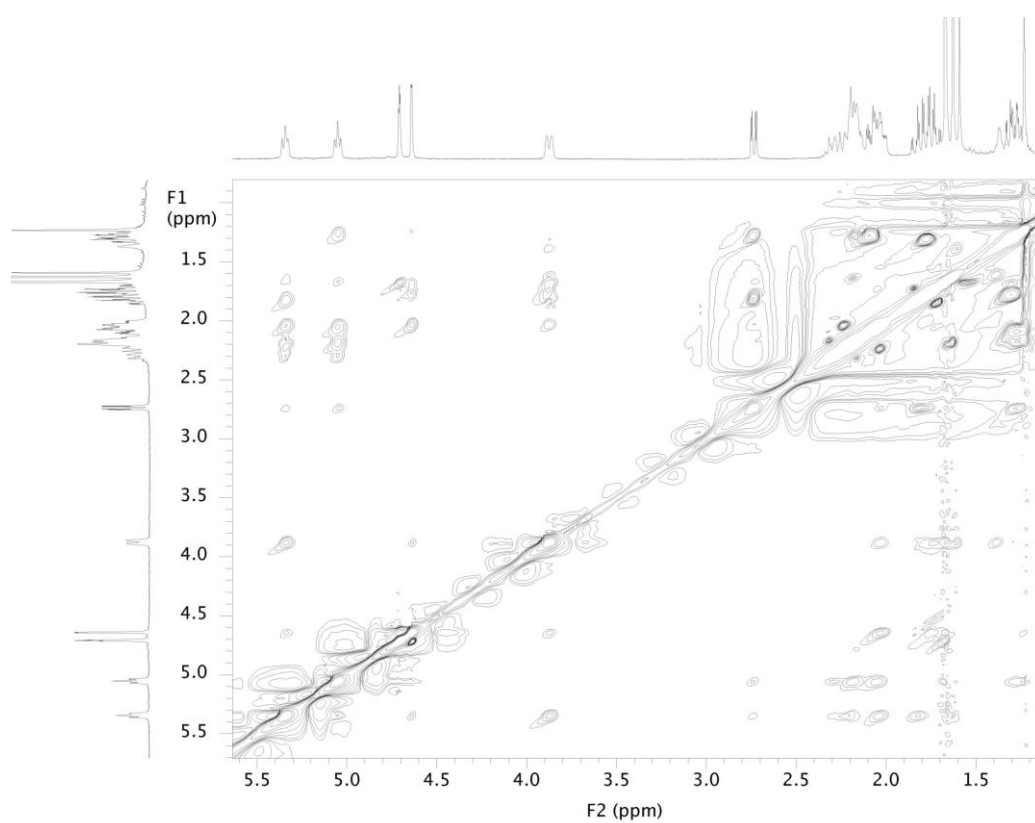

**Figure S13.**  $^1\text{H}$  NMR spectrum (400 MHz) of compound **3** in  $\text{CDCl}_3$ .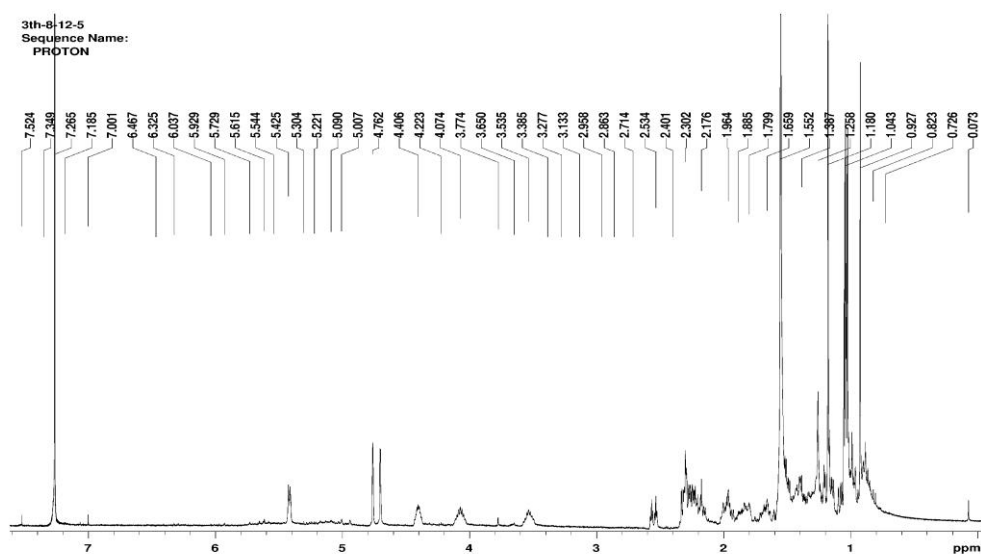**Figure S14.**  $^{13}\text{C}$  NMR spectrum (100 MHz) of compound **3** in  $\text{CDCl}_3$ .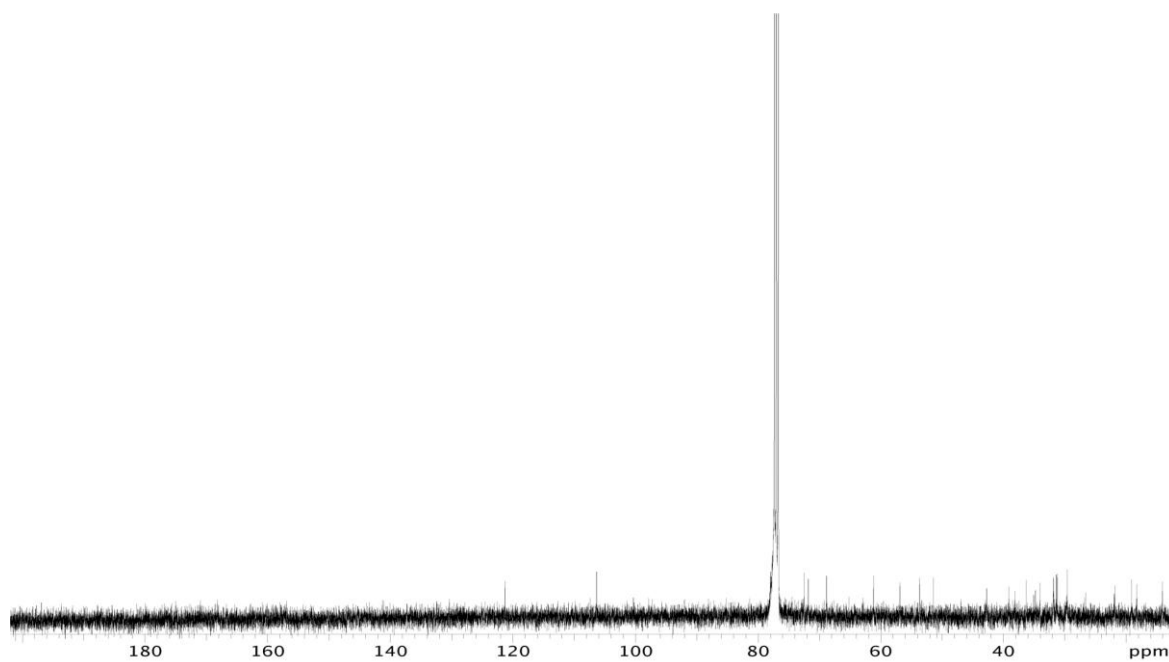

**Figure S15.** HSQC spectrum (400 MHz) of compound **3** in CDCl<sub>3</sub>.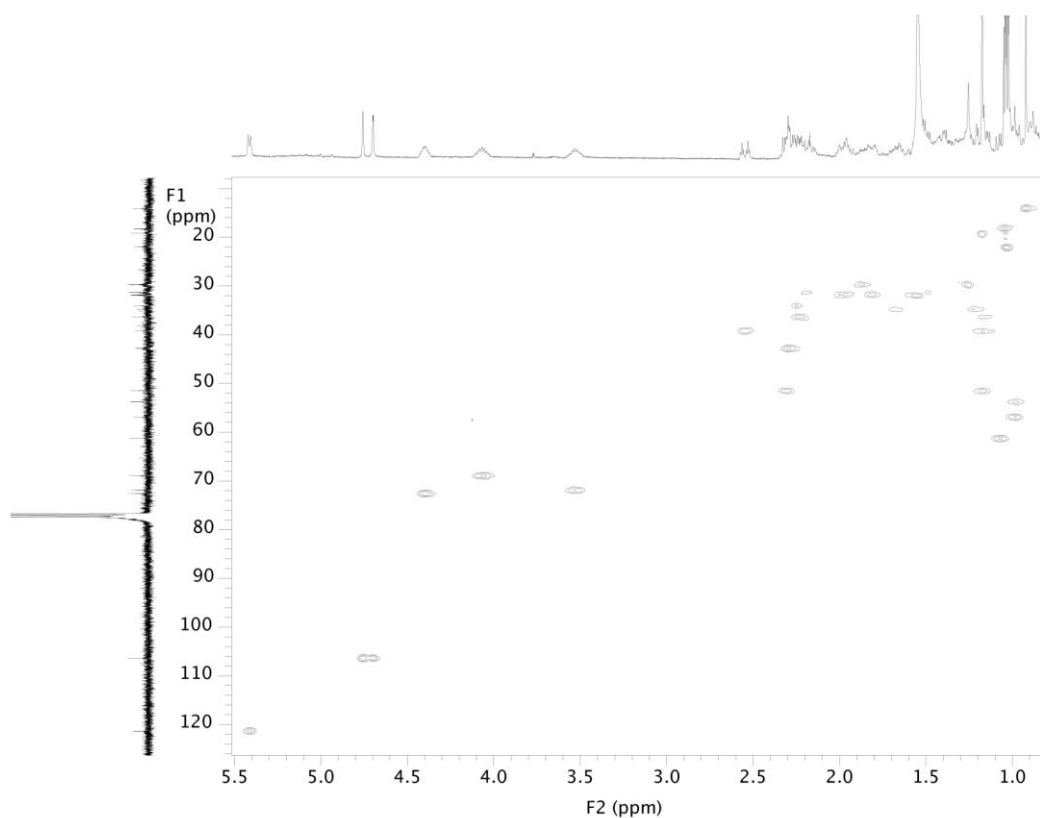**Figure S16.** HMBC spectrum (400 MHz) of compound **3** in CDCl<sub>3</sub>.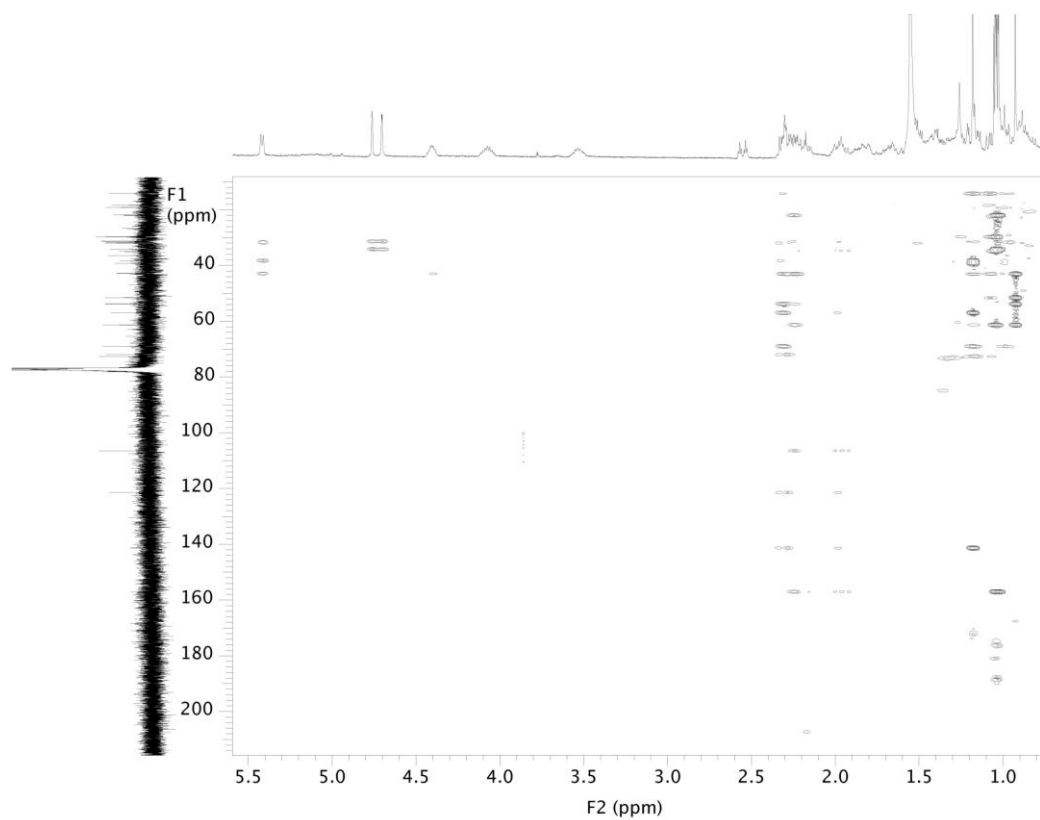

**Figure S17.** COSY spectrum (400 MHz) of compound **3** in CDCl<sub>3</sub>.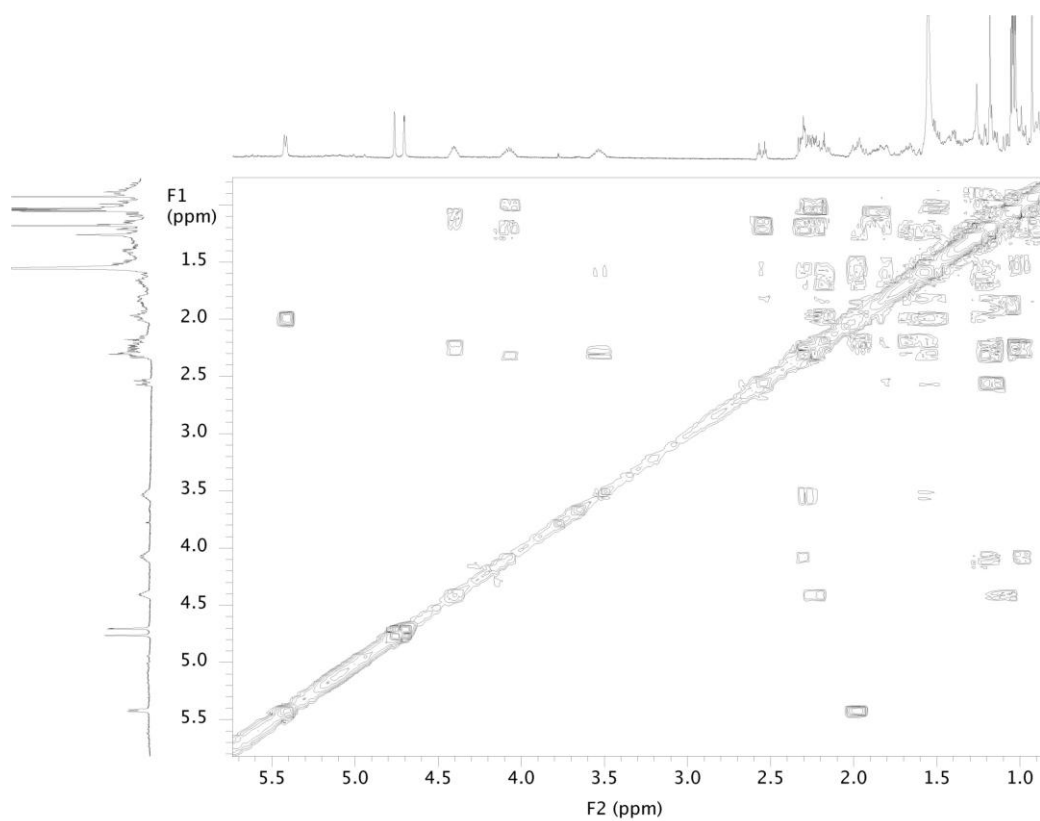**Figure S18.** NOESY spectrum (400 MHz) of compound **3** in CDCl<sub>3</sub>.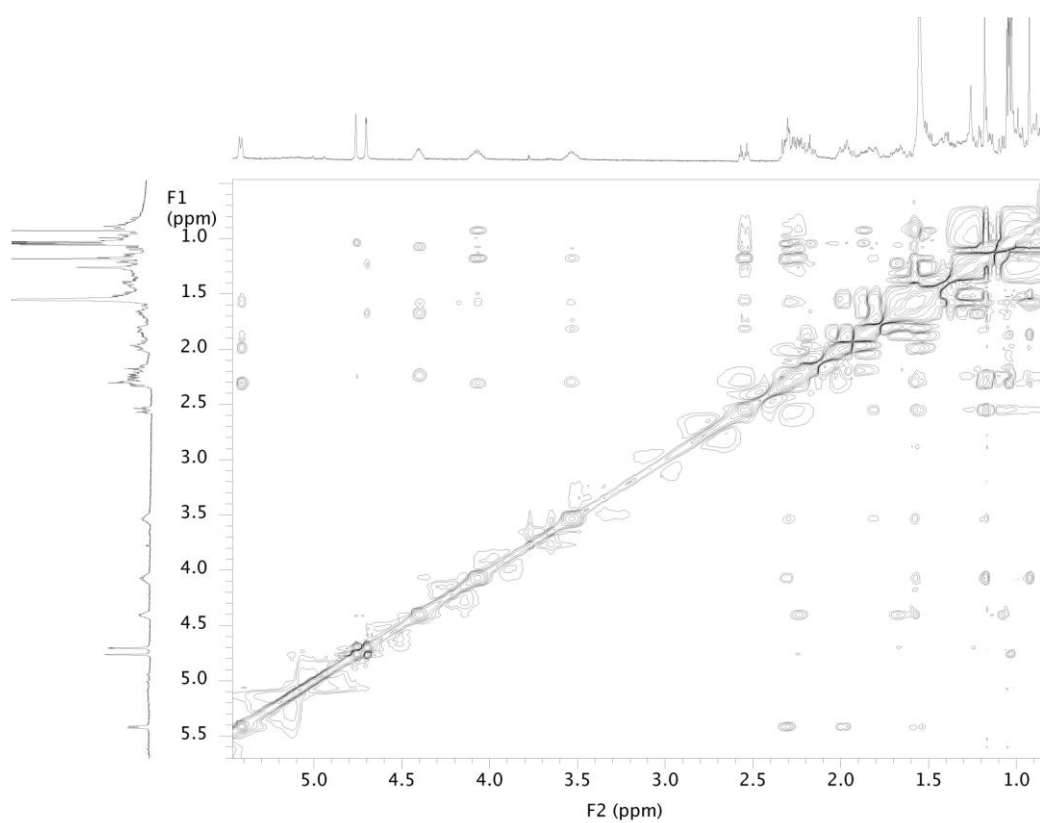

Supplement: Supplementary File 1 — Supplementary Materials (PDF, 897 KB) [file marinedrugs-11-03372-s001.pdf]
