# Supplementary material for: Secondary Metabolites from the Soft Coral Sinularia arborea
Source: MDPI journal article supplement (doi:10.3390/md11093372), 2013-09-03
Supplement: s2 [file s2]

marinedrugs-11-03372-s001.mol
  corina  12171322203D 1   1.00000     0.00000 
CORINA 3.49 0023  12.04.2013
 26 27  0  0  0  0  0  0  0  0999 V2000
   -0.8975    1.3660   -0.9157 C   0  0  0  0  0  0  0  0  0  0  0  0
    2.8273    2.4910   -4.9219 C   0  0  0  0  0  0  0  0  0  0  0  0
   -0.7444   -0.1462   -1.0913 C   0  0  0  0  0  0  0  0  0  0  0  0
    0.2982    2.1452   -0.3645 C   0  0  0  0  0  0  0  0  0  0  0  0
    1.7901    1.7259   -5.1568 C   0  0  0  0  0  0  0  0  0  0  0  0
    2.6831    3.7102   -4.0481 C   0  0  0  0  0  0  0  0  0  0  0  0
    4.1655    2.1515   -5.5265 C   0  0  0  0  0  0  0  0  0  0  0  0
    0.5146    3.5727   -0.8707 C   0  0  0  0  0  0  0  0  0  0  0  0
    1.4156    3.5841   -3.2007 C   0  0  0  0  0  0  0  0  0  0  0  0
    1.7877    3.6267   -1.7173 C   0  0  0  0  0  0  0  0  0  0  0  0
    2.6627    2.4456   -1.3847 C   0  0  0  0  0  0  0  0  0  0  0  0
    3.5457    2.4820   -0.1641 C   0  0  0  0  0  0  0  0  0  0  0  0
    2.6556    1.3872   -2.1566 C   0  0  0  0  0  0  0  0  0  0  0  0
    2.3269    4.5497   -1.5043 H   0  0  0  0  0  0  0  0  0  0  0  0
    3.8208    3.8184   -3.1902 O   0  0  0  0  0  0  0  0  0  0  0  0
    1.9369    0.5073   -6.0314 C   0  0  0  0  0  0  0  0  0  0  0  0
   -1.1549   -0.5394   -2.5117 C   0  0  0  0  0  0  0  0  0  0  0  0
   -0.3631    0.2950   -3.5205 C   0  0  0  0  0  0  0  0  0  0  0  0
    0.8234   -0.4908   -5.7081 C   0  0  0  0  0  0  0  0  0  0  0  0
    0.6476   -0.5815   -4.2142 C   0  0  0  0  0  0  0  0  0  0  0  0
    1.3733   -1.4217   -3.5188 C   0  0  0  0  0  0  0  0  0  0  0  0
   -1.7942    2.0663   -1.9386 C   0  0  0  0  0  0  0  0  0  0  0  0
   -0.8713    1.8867    0.4149 O   0  0  0  0  0  0  0  0  0  0  0  0
    1.2025    1.5854   -0.1263 H   0  0  0  0  0  0  0  0  0  0  0  0
   -1.2578    0.8479   -4.4879 O   0  0  0  0  0  0  0  0  0  0  0  0
   -2.1114   -0.1475   -5.1500 O   0  0  0  0  0  0  0  0  0  0  0  0
  1  3  1  0      
  1  4  1  0      
  5  2  2  0      
  2  6  1  0      
  2  7  1  0      
  4  8  1  0      
  6  9  1  0      
  9 10  1  0      
  8 10  1  0      
 10 11  1  0      
 11 12  1  0      
 11 13  2  0      
 10 14  1  0      
  6 15  1  0      
  5 16  1  0      
  3 17  1  0      
 17 18  1  0      
 16 19  1  0      
 18 20  1  0      
 20 19  1  0      
 20 21  2  0      
  1 22  1  0      
  4 23  1  0      
  1 23  1  0      
  4 24  1  0      
 18 25  1  0      
 25 26  1  0      
M  STY  1   1 SUP
M  SLB  1   1   1
M  SAL   1  2  25  26
M  SBL   1  1  26
M  SMT   1 OOH
M  SBV   1 26   -5.9475    9.7419
M  END
$$$$
