# Supplementary material for: Secondary Metabolites from the Soft Coral Sinularia arborea
Source: MDPI journal article supplement (doi:10.3390/md11093372), 2013-09-03
Supplement: s3 [file s3]

marinedrugs-11-03372-s001.mol
  ChemDraw12021317242D

 26 27  0  0  0  0  0  0  0  0999 V2000
   -0.2135    1.1896    0.0000 C   0  0  0  0  0  0  0  0  0  0  0  0
   -0.2135   -1.0791    0.0000 C   0  0  0  0  0  0  0  0  0  0  0  0
   -0.9280    0.7771    0.0000 C   0  0  0  0  0  0  0  0  0  0  0  0
    0.5009    0.7771    0.0000 C   0  0  0  0  0  0  0  0  0  0  0  0
   -0.9280   -0.6666    0.0000 C   0  0  0  0  0  0  0  0  0  0  0  0
    0.5009   -0.6666    0.0000 C   0  0  0  0  0  0  0  0  0  0  0  0
   -0.2135   -1.9041    0.0000 C   0  0  0  0  0  0  0  0  0  0  0  0
    1.3259    0.7771    0.0000 C   0  0  0  0  0  0  0  0  0  0  0  0
    1.3259   -0.6666    0.0000 C   0  0  0  0  0  0  0  0  0  0  0  0
    1.7384    0.0479    0.0000 C   0  0  0  0  0  0  0  0  0  0  0  0
    2.5634    0.0479    0.0000 C   0  0  0  0  0  0  0  0  0  0  0  0
    2.9759   -0.6666    0.0000 C   0  0  0  0  0  0  0  0  0  0  0  0
    2.9759    0.7623    0.0000 C   0  0  0  0  0  0  0  0  0  0  0  0
    2.1509    0.7623    0.0000 H   0  0  0  0  0  0  0  0  0  0  0  0
    0.9134   -1.3811    0.0000 O   0  0  0  0  0  0  0  0  0  0  0  0
   -1.6425   -1.0791    0.0000 C   0  0  0  0  0  0  0  0  0  0  0  0
   -1.6425    1.1896    0.0000 C   0  0  0  0  0  0  0  0  0  0  0  0
   -2.3570    0.7771    0.0000 C   0  0  0  0  0  0  0  0  0  0  0  0
   -2.3570   -0.6666    0.0000 C   0  0  0  0  0  0  0  0  0  0  0  0
   -1.9445    0.0627    0.0000 C   0  0  0  0  0  0  0  0  0  0  0  0
   -1.1195    0.0627    0.0000 C   0  0  0  0  0  0  0  0  0  0  0  0
   -0.6260    1.9041    0.0000 C   0  0  0  0  0  0  0  0  0  0  0  0
    0.6109    1.5471    0.0000 O   0  0  0  0  0  0  0  0  0  0  0  0
    0.7419    0.2003    0.0000 H   0  0  0  0  0  0  0  0  0  0  0  0
   -2.9759    1.1344    0.0000 O   0  0  0  0  0  0  0  0  0  0  0  0
   -2.2615    0.7219    0.0000 O   0  0  0  0  0  0  0  0  0  0  0  0
  1  3  1  0      
  1  4  1  0      
  5  2  2  0      
  2  6  1  0      
  2  7  1  0      
  4  8  1  0      
  6  9  1  0      
  9 10  1  0      
  8 10  1  0      
 10 11  1  0      
 11 12  1  0      
 11 13  2  0      
 10 14  1  6      
  6 15  1  6      
  5 16  1  0      
  3 17  1  0      
 17 18  1  0      
 16 19  1  0      
 18 20  1  0      
 20 19  1  0      
 20 21  2  0      
  1 22  1  6      
  4 23  1  0      
  1 23  1  0      
  4 24  1  1      
 18 25  1  1      
 25 26  1  0      
M  STY  1   1 SUP
M  SLB  1   1   1
M  SAL   1  2  25  26
M  SBL   1  1  26
M  SMT   1 OOH
M  SBV   1 26   -5.9475    9.7419
M  END
