# Supplementary material for: Secondary Metabolites from the Soft Coral Sinularia arborea
Source: MDPI journal article supplement (doi:10.3390/md11093372), 2013-09-03
Supplement: s4 [file s4]

marinedrugs-11-03372-s002.mol
  corina  12171322213D 1   1.00000     0.00000 
CORINA 3.49 0023  12.04.2013
 24 25  0  0  0  0  0  0  0  0999 V2000
   -0.1747    1.2295   -0.6076 C   0  0  0  0  0  0  0  0  0  0  0  0
    3.0261    2.2227   -5.2074 C   0  0  0  0  0  0  0  0  0  0  0  0
   -0.0863   -0.2854   -0.8031 C   0  0  0  0  0  0  0  0  0  0  0  0
    1.1240    1.9902   -0.3324 C   0  0  0  0  0  0  0  0  0  0  0  0
    2.0317    1.3696   -5.2301 C   0  0  0  0  0  0  0  0  0  0  0  0
    2.9479    3.4497   -4.3363 C   0  0  0  0  0  0  0  0  0  0  0  0
    4.2487    1.9759   -6.0533 C   0  0  0  0  0  0  0  0  0  0  0  0
    1.2484    3.4119   -0.8837 C   0  0  0  0  0  0  0  0  0  0  0  0
    1.8260    3.2768   -3.3106 C   0  0  0  0  0  0  0  0  0  0  0  0
    2.3898    3.4667   -1.9010 C   0  0  0  0  0  0  0  0  0  0  0  0
    3.3802    2.3703   -1.6043 C   0  0  0  0  0  0  0  0  0  0  0  0
    4.3402    2.5138   -0.4515 C   0  0  0  0  0  0  0  0  0  0  0  0
    3.4067    1.2925   -2.3484 C   0  0  0  0  0  0  0  0  0  0  0  0
    2.8882    4.4339   -1.8362 H   0  0  0  0  0  0  0  0  0  0  0  0
    4.1915    3.6308   -3.6560 O   0  0  0  0  0  0  0  0  0  0  0  0
    2.1124    0.1427   -6.1013 C   0  0  0  0  0  0  0  0  0  0  0  0
    1.1676   -0.6228   -1.6126 C   0  0  0  0  0  0  0  0  0  0  0  0
    0.8369   -0.5977   -3.0826 C   0  0  0  0  0  0  0  0  0  0  0  0
    1.3709   -1.0133   -5.4277 C   0  0  0  0  0  0  0  0  0  0  0  0
    1.7053   -1.0387   -3.9585 C   0  0  0  0  0  0  0  0  0  0  0  0
    3.0374   -1.5715   -3.4976 C   0  0  0  0  0  0  0  0  0  0  0  0
   -1.2599    1.9417   -1.4173 C   0  0  0  0  0  0  0  0  0  0  0  0
    0.1462    1.7535    0.6826 O   0  0  0  0  0  0  0  0  0  0  0  0
    2.0495    1.4161   -0.2907 H   0  0  0  0  0  0  0  0  0  0  0  0
  1  3  1  0      
  1  4  1  0      
  5  2  2  0      
  2  6  1  0      
  2  7  1  0      
  4  8  1  0      
  6  9  1  0      
  9 10  1  0      
  8 10  1  0      
 10 11  1  0      
 11 12  1  0      
 11 13  2  0      
 10 14  1  0      
  6 15  1  0      
  5 16  1  0      
  3 17  1  0      
 17 18  1  0      
 16 19  1  0      
 18 20  2  0      
 20 19  1  0      
 20 21  1  0      
  1 22  1  0      
  4 23  1  0      
  1 23  1  0      
  4 24  1  0      
M  END
$$$$
