# Supplementary material for: Secondary Metabolites from the Soft Coral Sinularia arborea
Source: MDPI journal article supplement (doi:10.3390/md11093372), 2013-09-03
Supplement: s5 [file s5]

marinedrugs-11-03372-s002.mol
  ChemDraw12021317242D

 24 25  0  0  0  0  0  0  0  0999 V2000
   -0.5230    1.1896    0.0000 C   0  0  0  0  0  0  0  0  0  0  0  0
   -0.5230   -1.0791    0.0000 C   0  0  0  0  0  0  0  0  0  0  0  0
   -1.2375    0.7771    0.0000 C   0  0  0  0  0  0  0  0  0  0  0  0
    0.1914    0.7771    0.0000 C   0  0  0  0  0  0  0  0  0  0  0  0
   -1.2375   -0.6666    0.0000 C   0  0  0  0  0  0  0  0  0  0  0  0
    0.1914   -0.6666    0.0000 C   0  0  0  0  0  0  0  0  0  0  0  0
   -0.5230   -1.9041    0.0000 C   0  0  0  0  0  0  0  0  0  0  0  0
    1.0164    0.7771    0.0000 C   0  0  0  0  0  0  0  0  0  0  0  0
    1.0164   -0.6666    0.0000 C   0  0  0  0  0  0  0  0  0  0  0  0
    1.4289    0.0479    0.0000 C   0  0  0  0  0  0  0  0  0  0  0  0
    2.2539    0.0479    0.0000 C   0  0  0  0  0  0  0  0  0  0  0  0
    2.6664   -0.6666    0.0000 C   0  0  0  0  0  0  0  0  0  0  0  0
    2.6664    0.7623    0.0000 C   0  0  0  0  0  0  0  0  0  0  0  0
    1.8414    0.7623    0.0000 H   0  0  0  0  0  0  0  0  0  0  0  0
    0.6039   -1.3811    0.0000 O   0  0  0  0  0  0  0  0  0  0  0  0
   -1.9520   -1.0791    0.0000 C   0  0  0  0  0  0  0  0  0  0  0  0
   -1.9520    1.1896    0.0000 C   0  0  0  0  0  0  0  0  0  0  0  0
   -2.6664    0.7771    0.0000 C   0  0  0  0  0  0  0  0  0  0  0  0
   -2.6664   -0.6666    0.0000 C   0  0  0  0  0  0  0  0  0  0  0  0
   -2.2539    0.0627    0.0000 C   0  0  0  0  0  0  0  0  0  0  0  0
   -1.4289    0.0627    0.0000 C   0  0  0  0  0  0  0  0  0  0  0  0
   -0.9355    1.9041    0.0000 C   0  0  0  0  0  0  0  0  0  0  0  0
    0.3014    1.5471    0.0000 O   0  0  0  0  0  0  0  0  0  0  0  0
    0.4325    0.2003    0.0000 H   0  0  0  0  0  0  0  0  0  0  0  0
  1  3  1  0      
  1  4  1  0      
  5  2  2  0      
  2  6  1  0      
  2  7  1  0      
  4  8  1  0      
  6  9  1  0      
  9 10  1  0      
  8 10  1  0      
 10 11  1  0      
 11 12  1  0      
 11 13  2  0      
 10 14  1  6      
  6 15  1  6      
  5 16  1  0      
  3 17  1  0      
 17 18  1  0      
 16 19  1  0      
 18 20  2  0      
 20 19  1  0      
 20 21  1  0      
  1 22  1  6      
  4 23  1  0      
  1 23  1  0      
  4 24  1  1      
M  END
