# Supplementary material for: Secondary Metabolites from the Soft Coral Sinularia arborea
Source: MDPI journal article supplement (doi:10.3390/md11093372), 2013-09-03
Supplement: s6 [file s6]

marinedrugs-11-03372-s003.mol
  corina  12171322213D 1   1.00000     0.00000 
CORINA 3.49 0023  12.04.2013
 32 35  0  0  0  0  0  0  0  0999 V2000
    0.1316    1.6827    0.1185 C   0  0  0  0  0  0  0  0  0  0  0  0
    0.1140    0.1624    0.0756 C   0  0  0  0  0  0  0  0  0  0  0  0
    0.6978   -0.3532   -1.2447 C   0  0  0  0  0  0  0  0  0  0  0  0
    1.5787    0.7410   -1.8199 C   0  0  0  0  0  0  0  0  0  0  0  0
    2.4509    1.4938   -0.8410 C   0  0  0  0  0  0  0  0  0  0  0  0
    1.5353    2.2863    0.0759 C   0  0  0  0  0  0  0  0  0  0  0  0
    1.5331    0.9905   -3.0902 C   0  0  0  0  0  0  0  0  0  0  0  0
    2.3228    2.0781   -3.7629 C   0  0  0  0  0  0  0  0  0  0  0  0
    2.7223    3.1164   -2.7024 C   0  0  0  0  0  0  0  0  0  0  0  0
    3.4614    2.3594   -1.5950 C   0  0  0  0  0  0  0  0  0  0  0  0
    3.5623    4.2063   -3.2865 C   0  0  0  0  0  0  0  0  0  0  0  0
    5.0575    4.0899   -2.9224 C   0  0  0  0  0  0  0  0  0  0  0  0
    5.2241    4.2023   -1.4290 C   0  0  0  0  0  0  0  0  0  0  0  0
    4.2457    3.2807   -0.6836 C   0  0  0  0  0  0  0  0  0  0  0  0
    3.6342    4.3212   -4.8178 C   0  0  0  0  0  0  0  0  0  0  0  0
    4.7506    5.3964   -4.9780 C   0  0  0  0  0  0  0  0  0  0  0  0
    5.6440    5.2778   -3.7189 C   0  0  0  0  0  0  0  0  0  0  0  0
    3.2561    0.4829   -0.0225 C   0  0  0  0  0  0  0  0  0  0  0  0
    0.7975   -0.3925    1.1938 O   0  0  0  0  0  0  0  0  0  0  0  0
    5.7236    2.8291   -3.4682 C   0  0  0  0  0  0  0  0  0  0  0  0
    5.5156    5.1319   -6.1540 O   0  0  0  0  0  0  0  0  0  0  0  0
    7.0862    4.9663   -4.1157 C   0  0  0  0  0  0  0  0  0  0  0  0
    7.6556    6.1328   -4.9255 C   0  0  0  0  0  0  0  0  0  0  0  0
    9.0454    5.7616   -5.4466 C   0  0  0  0  0  0  0  0  0  0  0  0
    7.7418    7.2084   -7.8516 C   0  0  0  0  0  0  0  0  0  0  0  0
    9.2570    7.0569   -7.7028 C   0  0  0  0  0  0  0  0  0  0  0  0
    9.6063    6.9106   -6.2442 C   0  0  0  0  0  0  0  0  0  0  0  0
    9.7227    5.8151   -8.4658 C   0  0  0  0  0  0  0  0  0  0  0  0
   10.3976    7.7823   -5.6696 C   0  0  0  0  0  0  0  0  0  0  0  0
    5.5882    6.1807   -3.1196 H   0  0  0  0  0  0  0  0  0  0  0  0
    3.3695    4.1107    0.0906 O   0  0  0  0  0  0  0  0  0  0  0  0
    7.9290    4.7609   -2.8554 C   0  0  0  0  0  0  0  0  0  0  0  0
  1  2  1  0      
  2  3  1  0      
  3  4  1  0      
  4  5  1  0      
  5  6  1  0      
  6  1  1  0      
  4  7  2  0      
  7  8  1  0      
  8  9  1  0      
  9 10  1  0      
 10  5  1  0      
  9 11  1  0      
 11 12  1  0      
 12 13  1  0      
 13 14  1  0      
 14 10  1  0      
 11 15  1  0      
 15 16  1  0      
 16 17  1  0      
 17 12  1  0      
  5 18  1  0      
  2 19  1  0      
 12 20  1  0      
 16 21  1  0      
 17 22  1  0      
 22 23  1  0      
 23 24  1  0      
 25 26  1  0      
 26 27  1  0      
 27 24  1  0      
 26 28  1  0      
 27 29  2  0      
 17 30  1  0      
 14 31  1  0      
 22 32  1  0      
M  END
$$$$
