# Supplementary material for: Secondary Metabolites from the Soft Coral Sinularia arborea
Source: MDPI journal article supplement (doi:10.3390/md11093372), 2013-09-03
Supplement: s7 [file s7]

marinedrugs-11-03372-s003.mol
  ChemDraw12021317252D

 32 35  0  0  0  0  0  0  0  0999 V2000
   -3.8137   -1.1035    0.0000 C   0  0  0  0  0  0  0  0  0  0  0  0
   -3.8137   -1.9285    0.0000 C   0  0  0  0  0  0  0  0  0  0  0  0
   -3.0992   -2.3410    0.0000 C   0  0  0  0  0  0  0  0  0  0  0  0
   -2.3847   -1.9285    0.0000 C   0  0  0  0  0  0  0  0  0  0  0  0
   -2.3847   -1.1035    0.0000 C   0  0  0  0  0  0  0  0  0  0  0  0
   -3.0992   -0.6910    0.0000 C   0  0  0  0  0  0  0  0  0  0  0  0
   -1.6703   -2.3410    0.0000 C   0  0  0  0  0  0  0  0  0  0  0  0
   -0.9558   -1.9285    0.0000 C   0  0  0  0  0  0  0  0  0  0  0  0
   -0.9558   -1.1035    0.0000 C   0  0  0  0  0  0  0  0  0  0  0  0
   -1.6703   -0.6910    0.0000 C   0  0  0  0  0  0  0  0  0  0  0  0
   -0.2413   -0.6910    0.0000 C   0  0  0  0  0  0  0  0  0  0  0  0
   -0.2413    0.1340    0.0000 C   0  0  0  0  0  0  0  0  0  0  0  0
   -0.9558    0.5465    0.0000 C   0  0  0  0  0  0  0  0  0  0  0  0
   -1.6703    0.1340    0.0000 C   0  0  0  0  0  0  0  0  0  0  0  0
    0.5433   -0.9459    0.0000 C   0  0  0  0  0  0  0  0  0  0  0  0
    1.0282   -0.2785    0.0000 C   0  0  0  0  0  0  0  0  0  0  0  0
    0.5433    0.3890    0.0000 C   0  0  0  0  0  0  0  0  0  0  0  0
   -2.3847   -0.2785    0.0000 C   0  0  0  0  0  0  0  0  0  0  0  0
   -4.5282   -2.3410    0.0000 O   0  0  0  0  0  0  0  0  0  0  0  0
   -0.2413    0.9590    0.0000 C   0  0  0  0  0  0  0  0  0  0  0  0
    1.8532   -0.2785    0.0000 O   0  0  0  0  0  0  0  0  0  0  0  0
    0.9558    1.1035    0.0000 C   0  0  0  0  0  0  0  0  0  0  0  0
    1.6703    1.5160    0.0000 C   0  0  0  0  0  0  0  0  0  0  0  0
    2.3847    1.1035    0.0000 C   0  0  0  0  0  0  0  0  0  0  0  0
    3.8137    0.2785    0.0000 C   0  0  0  0  0  0  0  0  0  0  0  0
    3.8137    1.1035    0.0000 C   0  0  0  0  0  0  0  0  0  0  0  0
    3.0992    1.5160    0.0000 C   0  0  0  0  0  0  0  0  0  0  0  0
    4.5282    1.5160    0.0000 C   0  0  0  0  0  0  0  0  0  0  0  0
    3.0992    2.3410    0.0000 C   0  0  0  0  0  0  0  0  0  0  0  0
    1.3402    0.6025    0.0000 H   0  0  0  0  0  0  0  0  0  0  0  0
   -2.3847    0.5465    0.0000 O   0  0  0  0  0  0  0  0  0  0  0  0
    0.2413    1.5160    0.0000 C   0  0  0  0  0  0  0  0  0  0  0  0
  1  2  1  0      
  2  3  1  0      
  3  4  1  0      
  4  5  1  0      
  5  6  1  0      
  6  1  1  0      
  4  7  2  0      
  7  8  1  0      
  8  9  1  0      
  9 10  1  0      
 10  5  1  0      
  9 11  1  0      
 11 12  1  0      
 12 13  1  0      
 13 14  1  0      
 14 10  1  0      
 11 15  1  0      
 15 16  1  0      
 16 17  1  0      
 17 12  1  0      
  5 18  1  1      
  2 19  1  1      
 12 20  1  1      
 16 21  1  1      
 17 22  1  1      
 22 23  1  0      
 23 24  1  0      
 25 26  1  0      
 26 27  1  0      
 27 24  1  0      
 26 28  1  0      
 27 29  2  0      
 17 30  1  6      
 14 31  1  6      
 22 32  1  6      
M  END
